# Supplementary material for: Tunable stellate mesoporous silica nanoparticles for intracellular drug delivery
Source: Royal Society of Chemistry journal article supplement (doi:10.1039/c4tb01601g), 2014-12-08
Supplement: c4tb01601g1.pdf [file c4tb01601g1.pdf]

## Supplementary Information

# Tunable Stellate Mesoporous Silica Nanoparticles for Intracellular Drug Delivery

*Lin Xiong,<sup>a</sup> Xin Du,<sup>a</sup> Bingyang Shi,<sup>a</sup> Jingxiu Bi,<sup>a</sup> Freddy Kleitz,<sup>b</sup> and Shi Zhang Qiao<sup>\*,a</sup>*

<sup>a</sup> School of Chemical Engineering, The University of Adelaide, Adelaide, SA 5005, Australia

<sup>b</sup> Department of Chemistry and Centre de Recherche sur les Matériaux Avancés (CERMA),  
Université Laval, Quebec City, QC G1V 0A6, Canada.

\* Address correspondence to: [s.qiao@adelaide.edu.au](mailto:s.qiao@adelaide.edu.au)



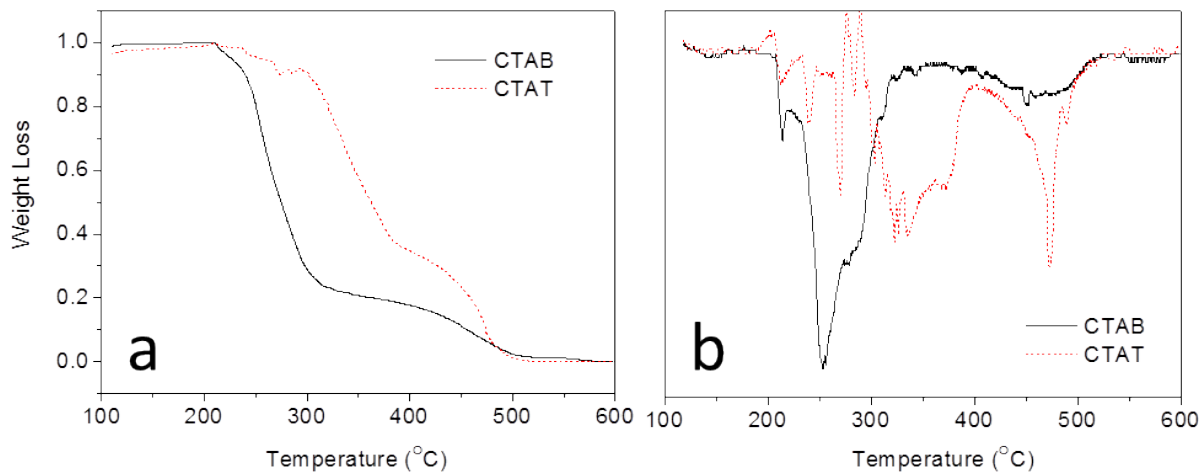

Fig. S2 TGA (a) and DTG (b) curves of CTAB and CTAT surfactants.

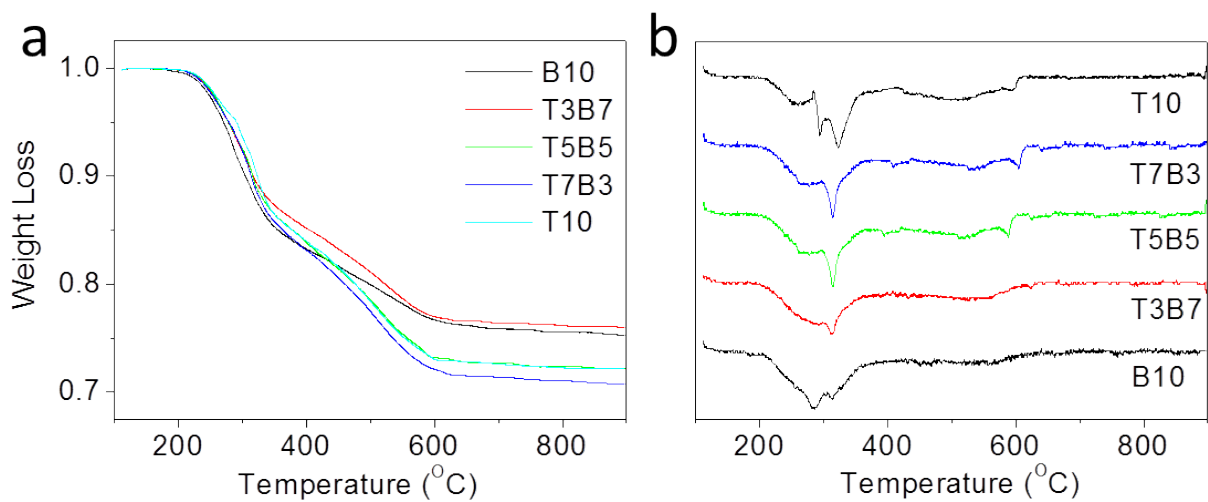

Fig. S3 TGA (a) and DTG (b) curves of as-prepared samples synthesized with mixed surfactants.

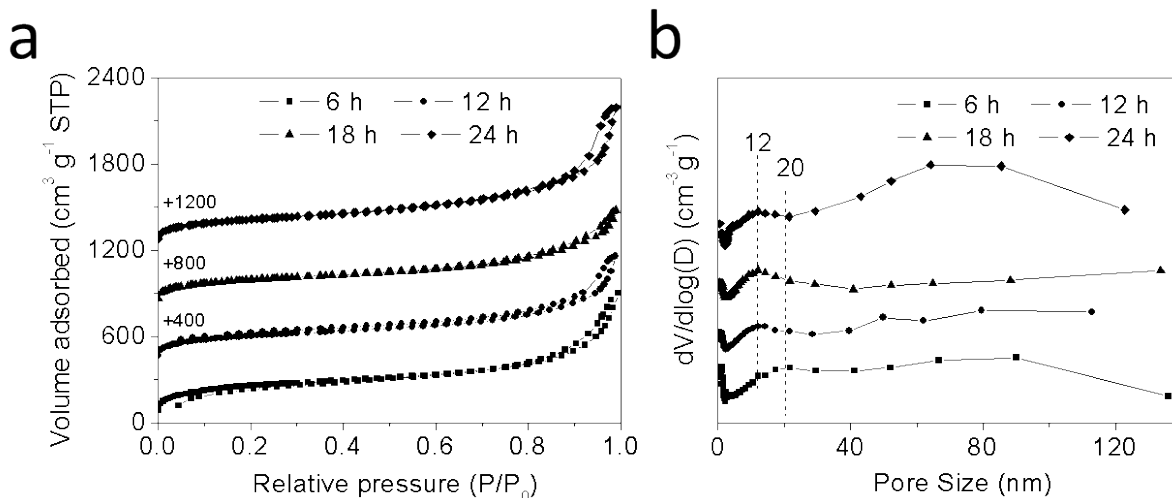

Fig. S4 Nitrogen adsorption-desorption isotherms (a) and respective pore size distribution curves (b) of stellate particles after various reaction times (6 h, 12 h, 18 h and 24 h) at 35 °C.

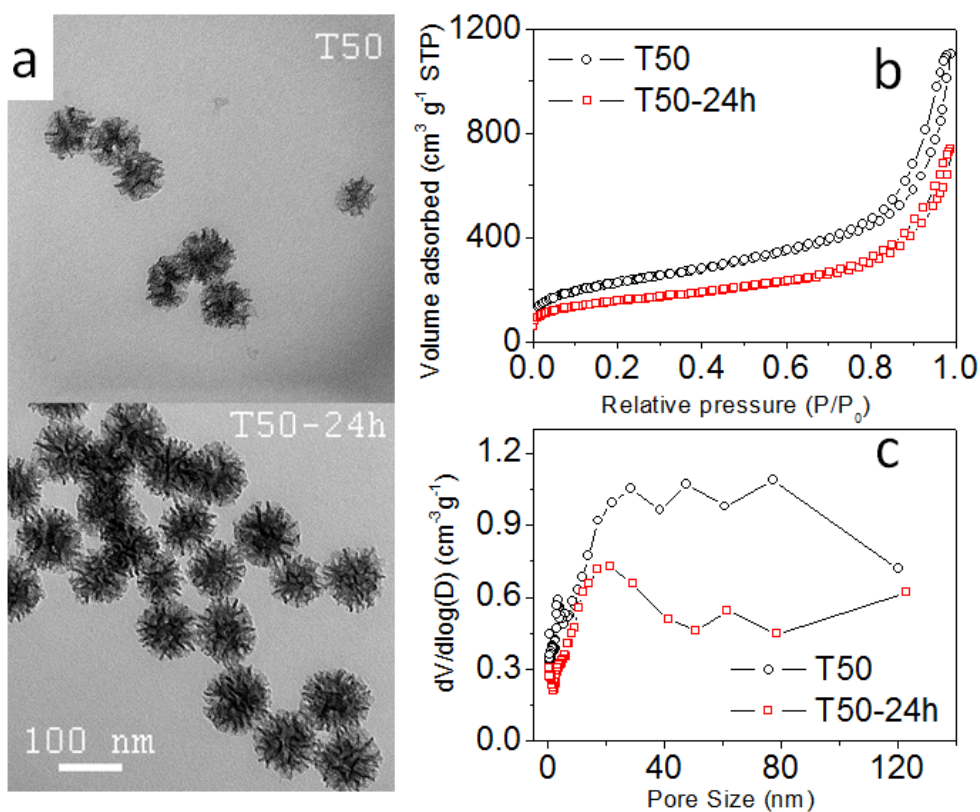

Fig. S5 TEM images (a), nitrogen adsorption-desorption isotherms (b) and respective BJH pore size distribution curves (c) of T50 and T50-24h.

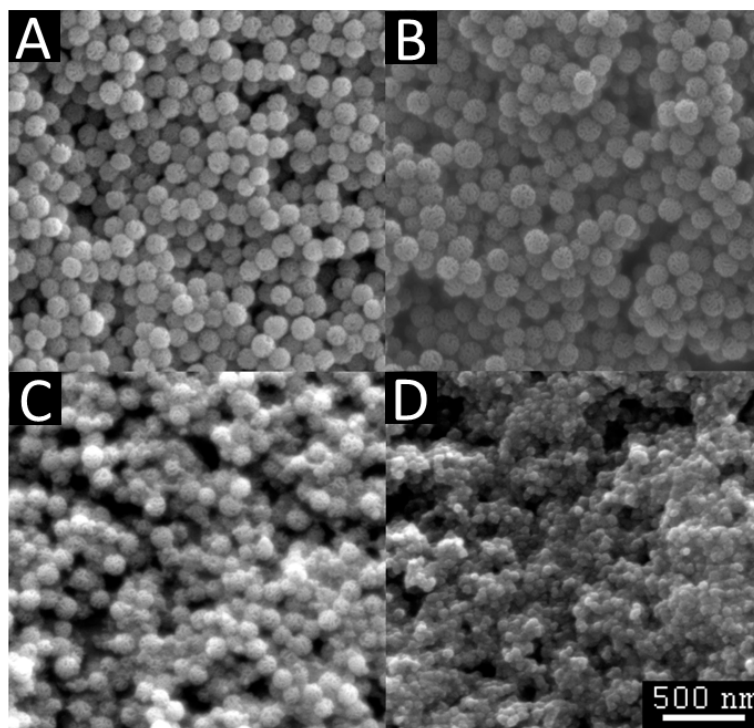

Fig. S6 SEM images of particles synthesized under various catalyst concentrations: (A) TC/2, (B) TC/4, (C) TC/8 and (D) TN.

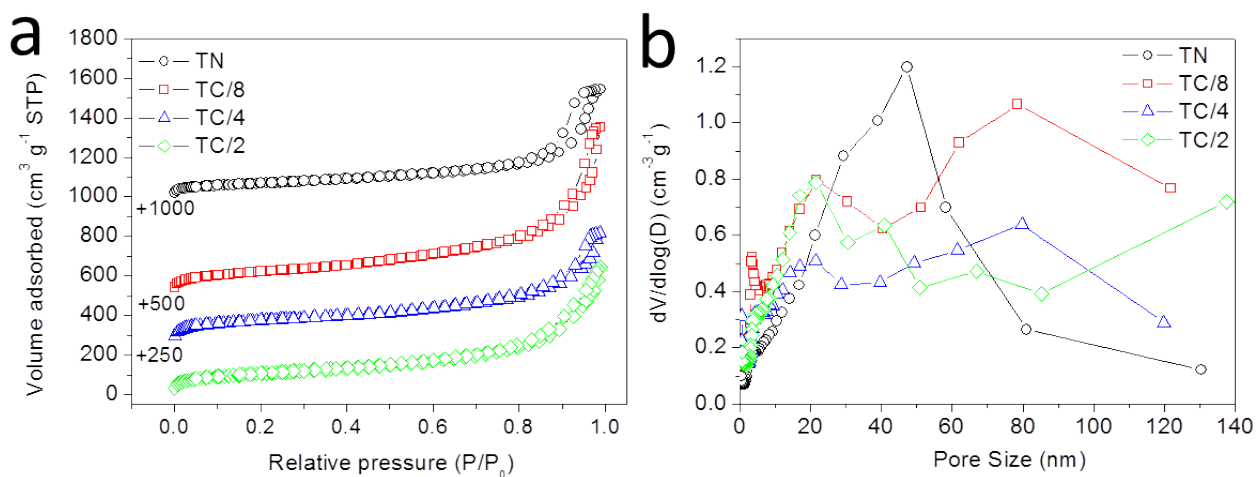

Fig. S7 Nitrogen adsorption-desorption isotherms (a) and respective pore size distribution curves (b) of particles synthesized under different TEA/TEOS ratio.

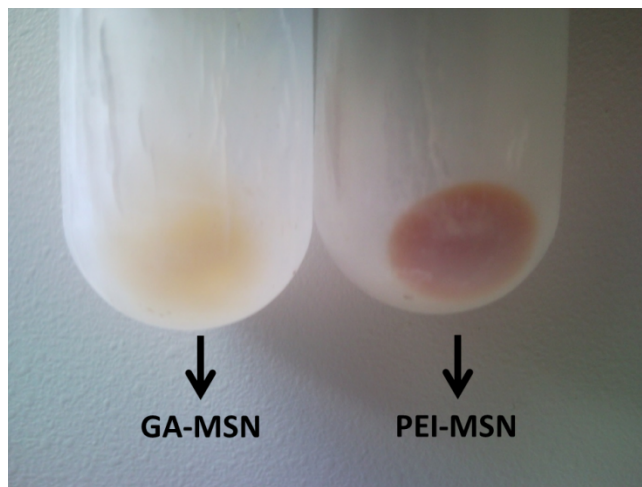

Fig. S8 Color changes of silica nanoparticles from white to yellow and brown after glutaraldehyde and PEI conjugation.

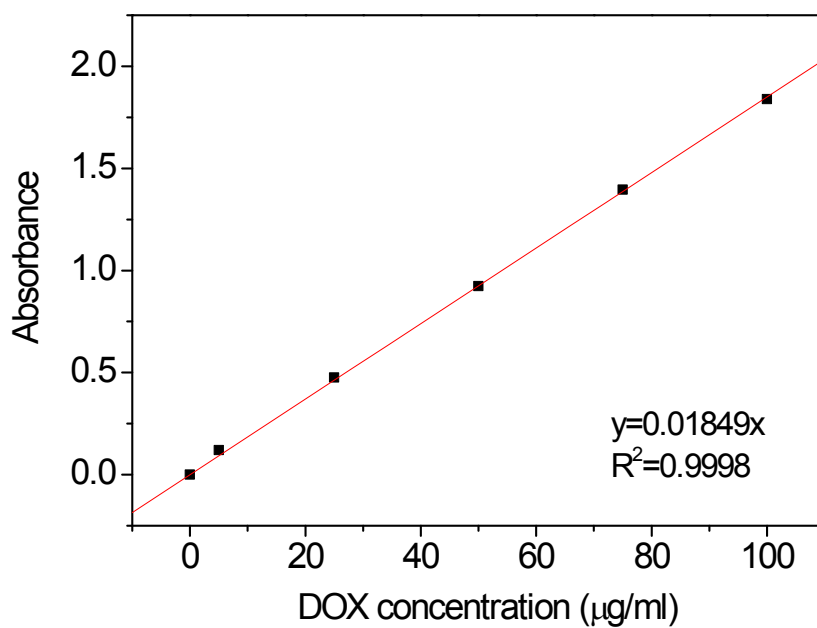

Fig. S9 Calibration curve of doxorubicin in water by absorbance measurements at 480 nm.

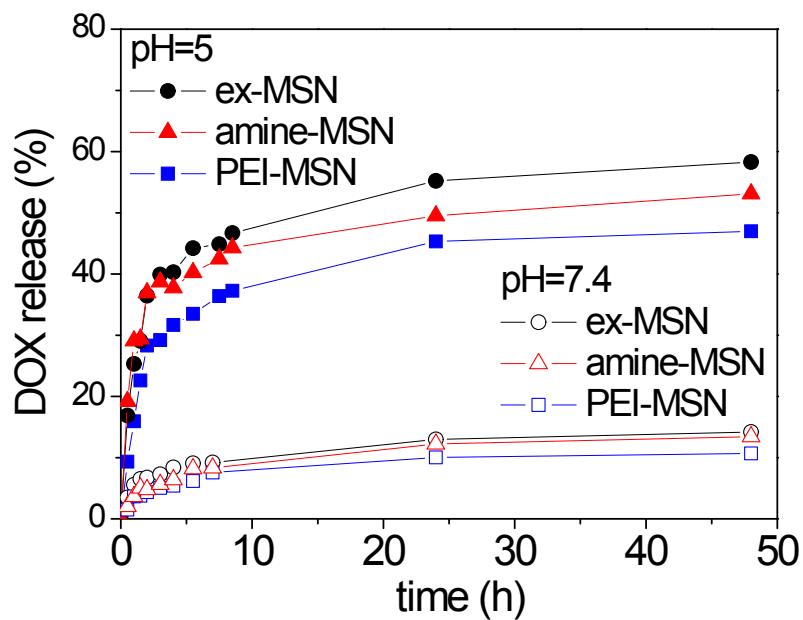

Fig. S10 Release profiles of DOX loaded silica nanoparticles at pH 7.4 and pH 5.0 at 37 °C.

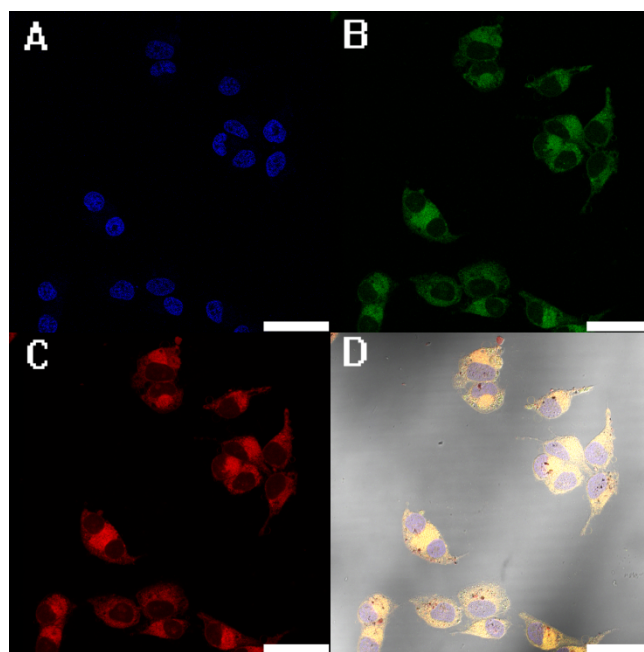

Fig. S11 CLSM images of HeLa cells after incubation with 50  $\mu\text{g/ml}$  DOX loaded PEI-MSN for 8 h. Image (D) is the merge picture of blue channel from Hoechst (A), green channel from PEI-silica (B), red channel from DOX (C) and the differential interference contrast (DIC) channel. Scale bars are 50  $\mu\text{m}$ .

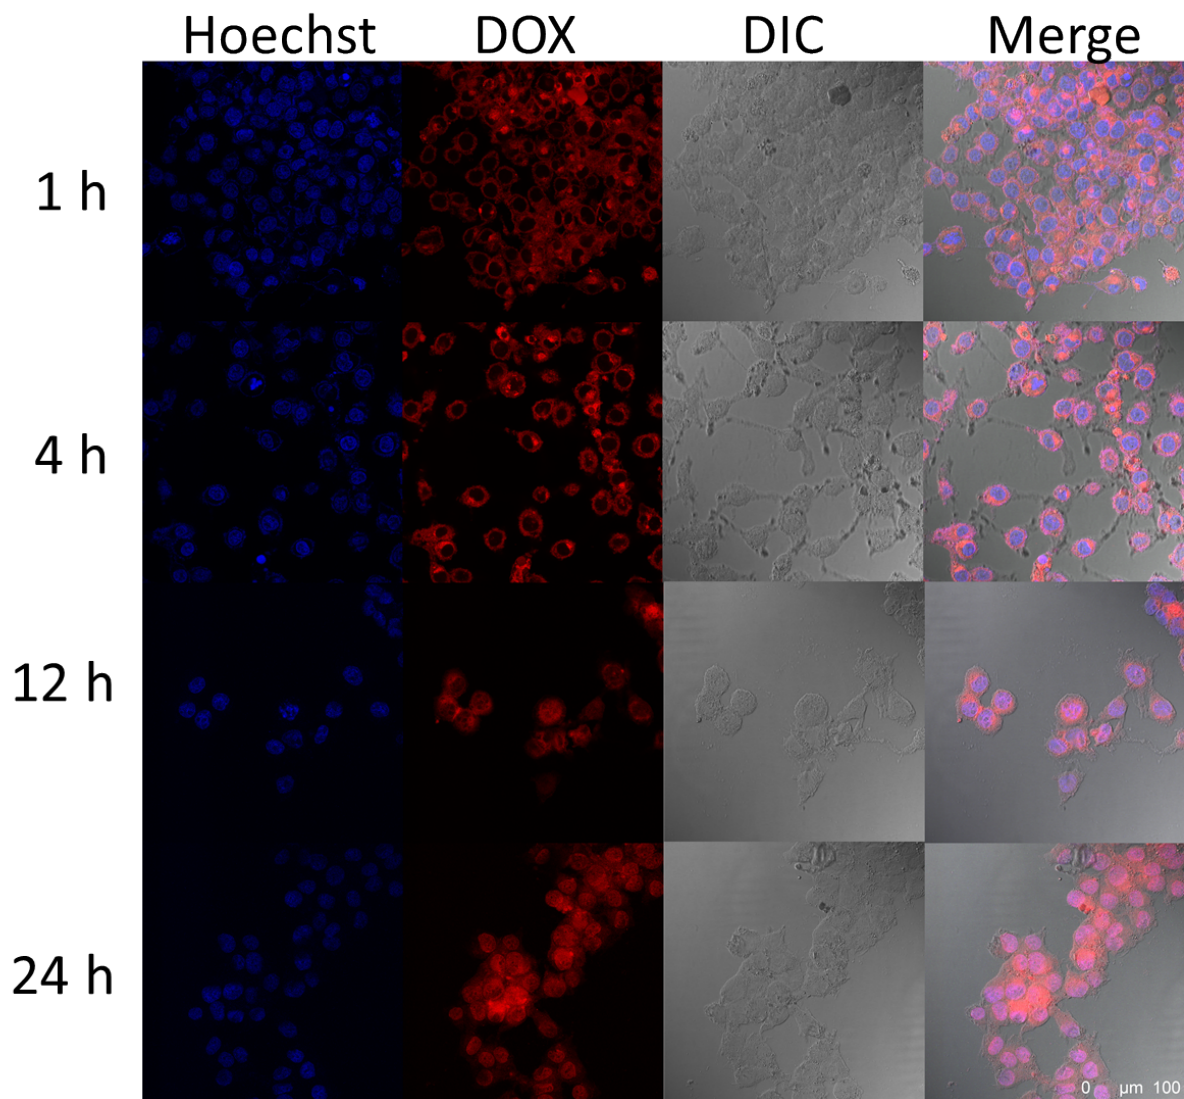

Fig. S12 CLSM images of HeLa cells after incubation with DOX loaded PEI-MSN for different time periods (1 h, 4 h, 12 h and 24 h). The equivalent DOX concentration is 1  $\mu\text{g/ml}$ .
